# Supplementary material for: Glow-type chemiluminescent hydrogels for point-of-care testing (POCT) of cholesterol
Source: Royal Society of Chemistry journal article supplement (doi:10.1039/d1an00676b), 2021-01-01
Supplement: d1an00676b1.pdf [file d1an00676b1.pdf]

## Glow-type chemiluminescent hydrogels for point-of-care testing (POCT) of cholesterol

Yu Ning<sup>a</sup>, Fan Lu<sup>a</sup>, Yucheng Liu<sup>b</sup>, Sisi Yang<sup>a</sup>, Fubing Wang<sup>c</sup>, Xinghu Ji<sup>\*a</sup>, Zhike He<sup>\*a</sup>

### Supporting information

#### SEM imaging

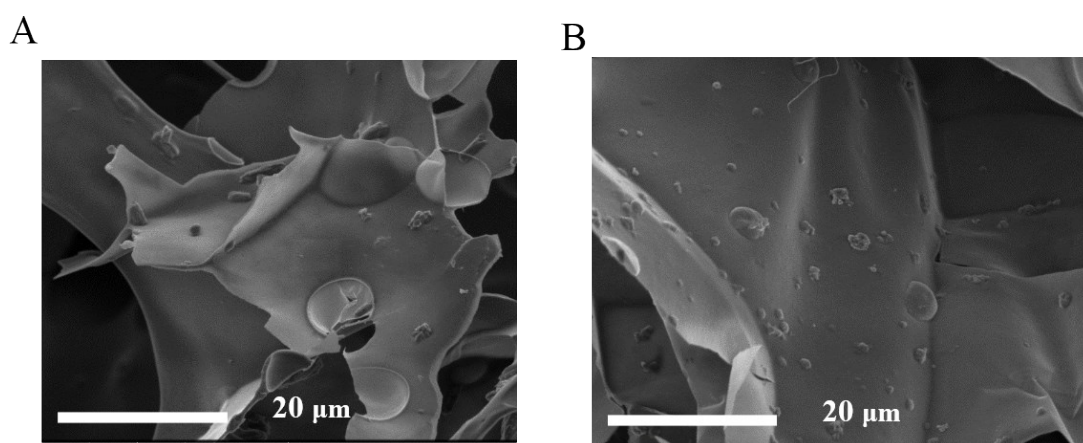

**Figure S1** SEM images of freeze-dried hydrogels in the absence (A) and presence (B) of enzyme.

#### Fluorescence imaging

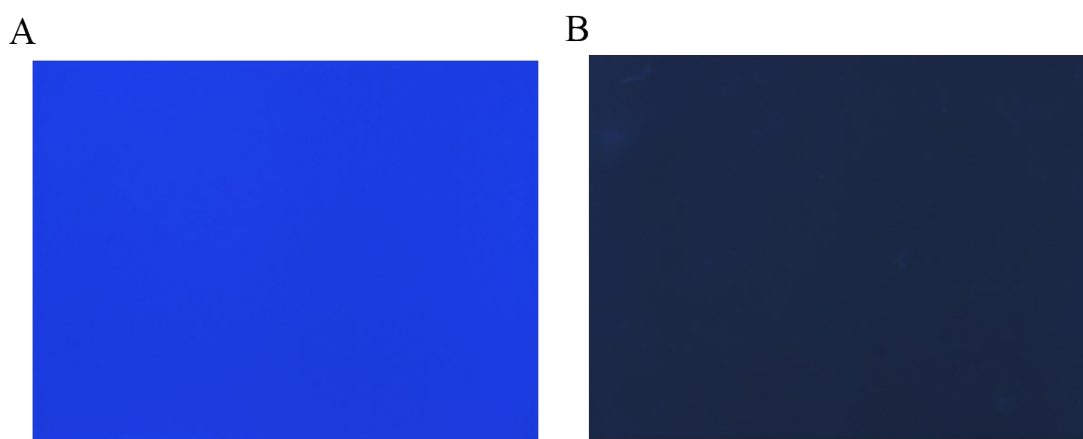

**Figure S2** Fluorescence images of hydrogels in the presence (A) and absence (B) of luminol.

## Optimization of reagent concentration

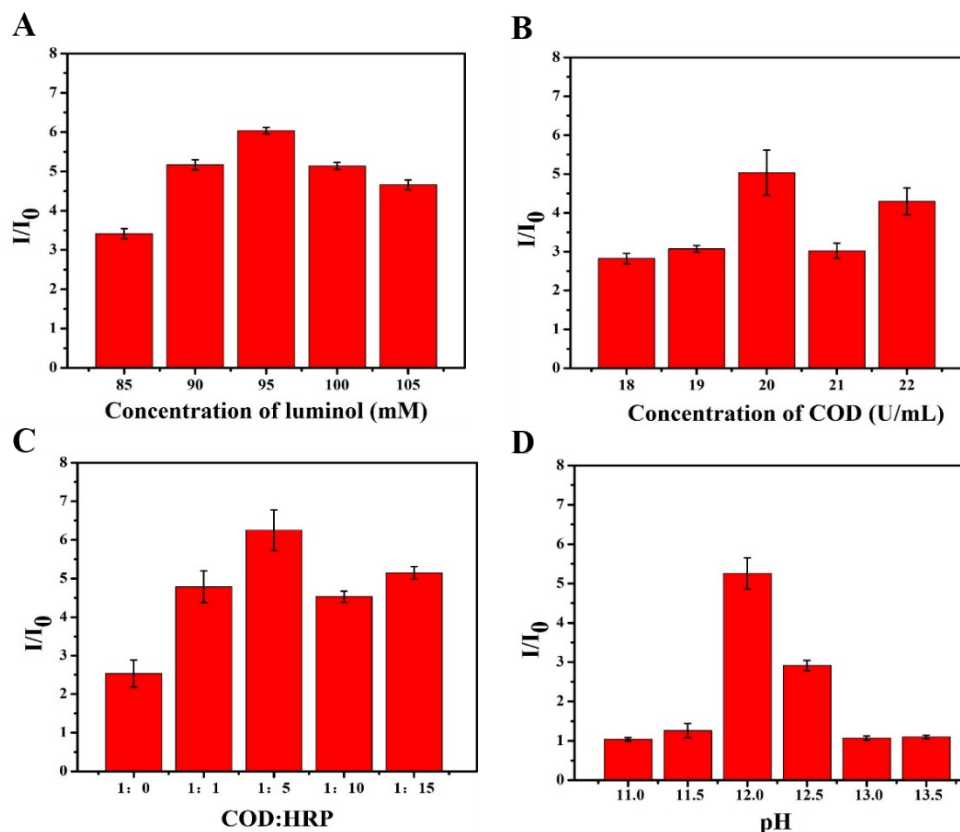

**Figure S3** (A) Optimization of luminol concentration. For HRP/COD/luminol/Alg hydrogels: 20 U/mL COD, COD: HRP=1: 5. (B) Optimization of pH of cholesterol solution. For HRP/COD/luminol/Alg hydrogels: 95 mM luminol, 20 U/mL COD, COD: HRP=1: 5. (C) Optimization of COD concentration. For HRP/COD/luminol/Alg hydrogels: 95 mM luminol, COD: HRP=1: 5. (D) Optimization the ratio of COD: HRP. For HRP/COD/luminol/Alg hydrogels: 95 mM luminol, 20 U/mL COD. Reaction condition: 100  $\mu$ L hydrogels with 100  $\mu$ L 0.1 mM cholesterol. Exposure time: 30 s.

## Comparison of different systems for cholesterol detection

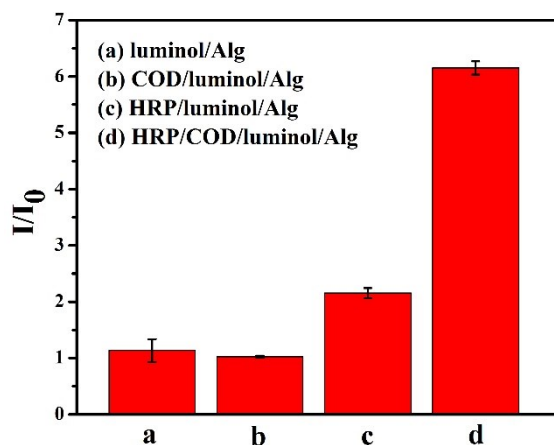

**Figure S4** Comparison of different systems for cholesterol detection. Cholesterol: 0.1 mM.

**Table S1** Comparison of material-based detection methods for cholesterol detection

| Material                                          | Method            | Linear range ( $\mu\text{M}$ ) | LOD ( $\mu\text{M}$ ) | Reference |
|---------------------------------------------------|-------------------|--------------------------------|-----------------------|-----------|
| AuE/dithiol/AuNPs/MUA/C hOx                       | electrochemistry  | 40–220                         | 34.6                  | [1]       |
| $\text{Fe}_3\text{O}_4@\text{MIL-100}(\text{Fe})$ | colorimetric      | 2–50                           | 0.8                   | [2]       |
| Polypyrrole nanoparticles (PPy NPs)               | colorimetric      | 10–100                         | 3.5                   | [3]       |
| CuO/graphene nanosphere(CuO:GNS)                  | colorimetric      | 100–800                        | 78.0                  | [4]       |
| AuNC@BSA                                          | fluorescence      | 0–300                          | 12.0                  | [5]       |
| Pt /porous carbon (Pt/PCN)                        | colorimetric      | 25–500                         | 8.3                   | [6]       |
| HRP/COD/luminol/Alg hydrogels                     | Chemiluminescence | 10–350                         | 7.2                   | This work |

**Table S2** Standard addition recovery experiments for cholesterol in human serum

| Sample number | Added ( $\mu\text{M}$ ) | Found ( $\mu\text{M}$ ) | Recovery (%) | RSD (%)<br>(n=3) |
|---------------|-------------------------|-------------------------|--------------|------------------|
| Serum 1       | 25.0                    | $24.5 \pm 0.5$          | 98.2         | 2.4              |
|               | 50.0                    | $48.0 \pm 2.0$          | 96.1         | 4.0              |
|               | 75.0                    | $78.5 \pm 2.5$          | 104.5        | 6.3              |
| Serum 2       | 25.0                    | $25.5 \pm 1.5$          | 102.0        | 6.6              |
|               | 50.0                    | $52.0 \pm 0.5$          | 103.8        | 0.6              |
|               | 75.0                    | $72.0 \pm 3.5$          | 95.9         | 3.9              |
| Serum 3       | 25.0                    | $23.0 \pm 0.5$          | 92.8         | 2.7              |
|               | 50.0                    | $50.0 \pm 1.5$          | 100.4        | 2.9              |
|               | 75.0                    | $80.5 \pm 1.5$          | 107.5        | 1.8              |

## References

1. U. Saxena, M. Chakraborty and P. Goswami, *Biosens. Bioelectron.*, 2011, **26**, 3037-3043.
2. Y. Wu, Y. Ma, G. Xu, F. Wei, Y. Ma, Q. Song, X. Wang, T. Tang, Y. Song, M. Shi, X. Xu and Q. Hu, *Sens. Actuators, B*, 2017, **249**, 195-202.
3. C. Hong, X. Zhang, C. Wu, Q. Chen, H. Yang, D. Yang, Z. Huang, R. Cai and W. Tan, *ACS Appl. Mater. Interfaces.*, 2020, **12**, 54426-54432.
4. V. Sharma and S. M. Mobin, *Sens. Actuators, B*, 2017, **240**, 338-348.
5. X. Chen and G. A. Baker, *Analyst*, 2013, **138**, 7299-7302.
6. W. Shi, H. Fan, S. Ai and L. Zhu, *Sens. Actuators, B*, 2015, **221**, 1515-1522.
